# Supplementary material for: Template-free synthesis of salmon pink tube-shaped structure carbon nitride with enhanced visible light photocatalytic activity
Source: Royal Society of Chemistry journal article supplement (doi:10.1039/c8ra09950b), 2019-01-01
Supplement: c8ra09950b1.pdf [file c8ra09950b1.pdf]

Electronic Supplementary Material (ESI) for RSC Advances.  
This journal is ©The Royal Society of Chemistry 2016

## Supporting Information

### **Template-free synthesis of salmon pink tube-shaped structure carbon nitride with enhanced visible light photocatalytic activity**

Youzhi Cao,<sup>a</sup> Xinbo Jing,<sup>a</sup> Yajuan Chen<sup>a</sup> Wenjie Kang<sup>a</sup> Shufen Wang<sup>\*b</sup> and Wei Wang<sup>\*b</sup>

<sup>a</sup> School of Chemistry and Chemical Engineering/Key Laboratory for Green Processing of Chemical Engineering of Xinjiang Bingtuan, Shihezi University, Shihezi 832003, China.

<sup>b</sup> College of Sciences, Shihezi University, Shihezi 832003, China.

*\*wangwei\_group@sina.com*

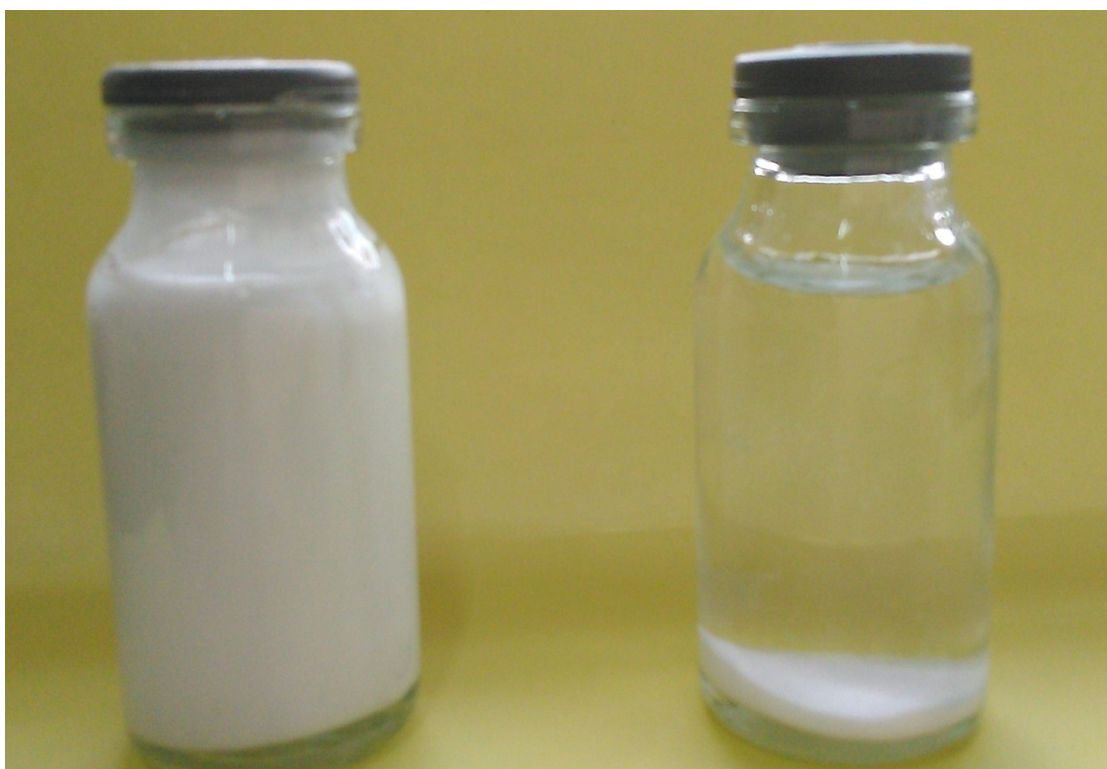

**Figure S1** the photographs of reaction phenomena for melamine or M-10-200-24 and 1mol/L HCl.

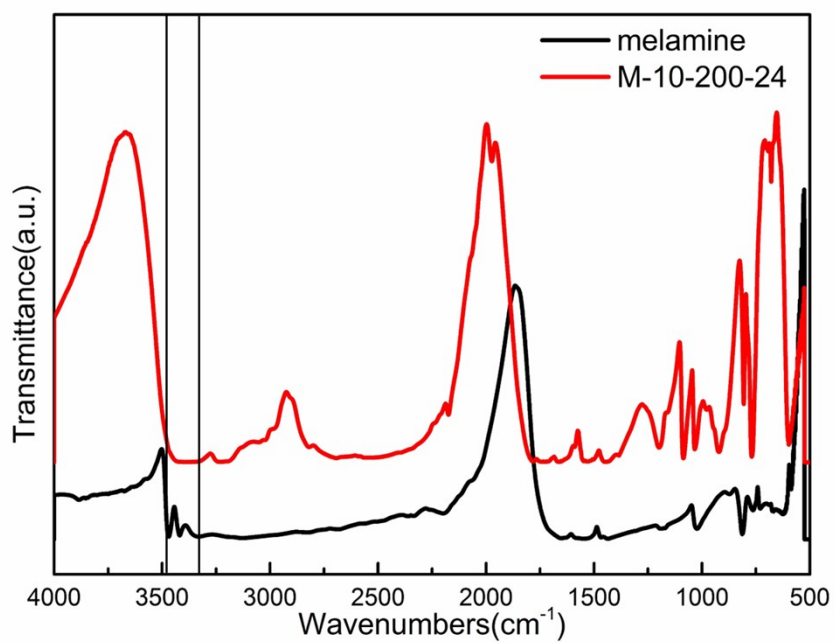

**Figure S2.** FT-IR spectra of melamine and M-10-200-24.

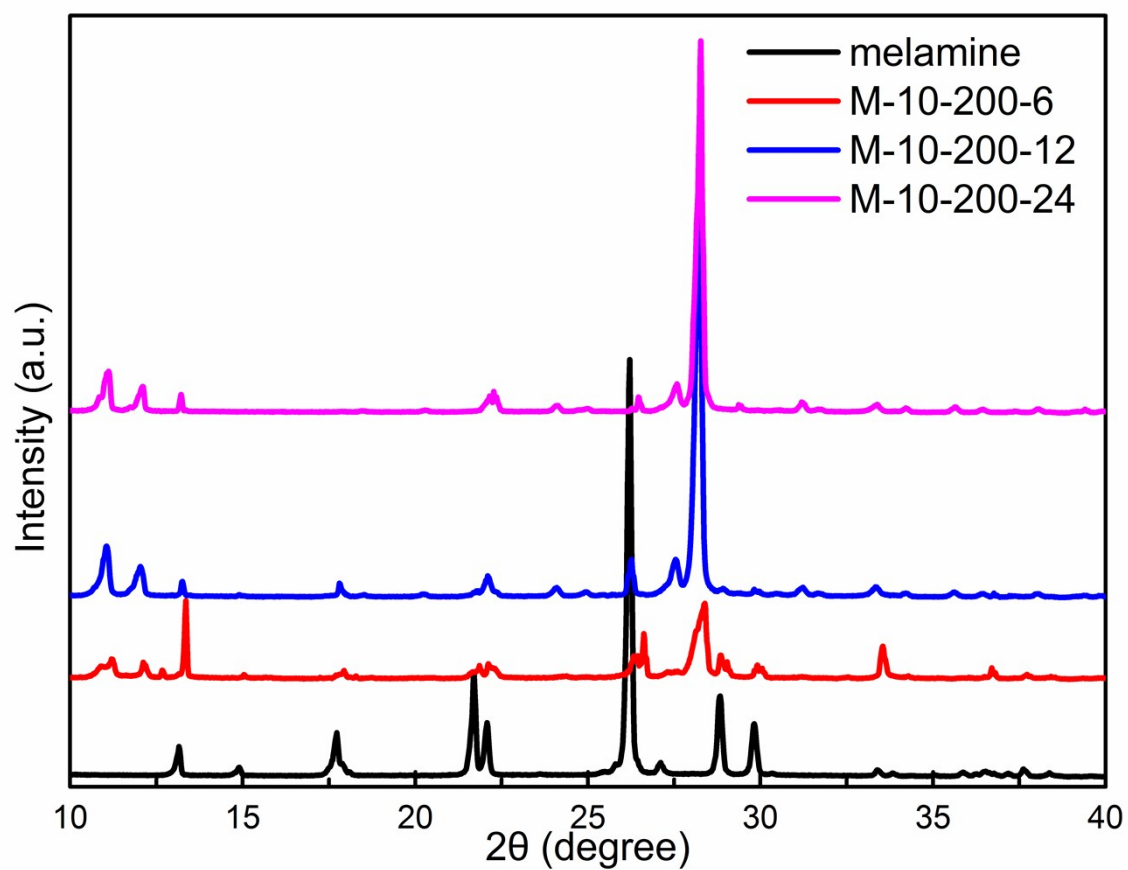

**Figure S3.** XRD patterns of monoclinic-phase melamine (raw melamine) and orthorhombic-phase melamine (melamine pretreated with a hydrothermal process).

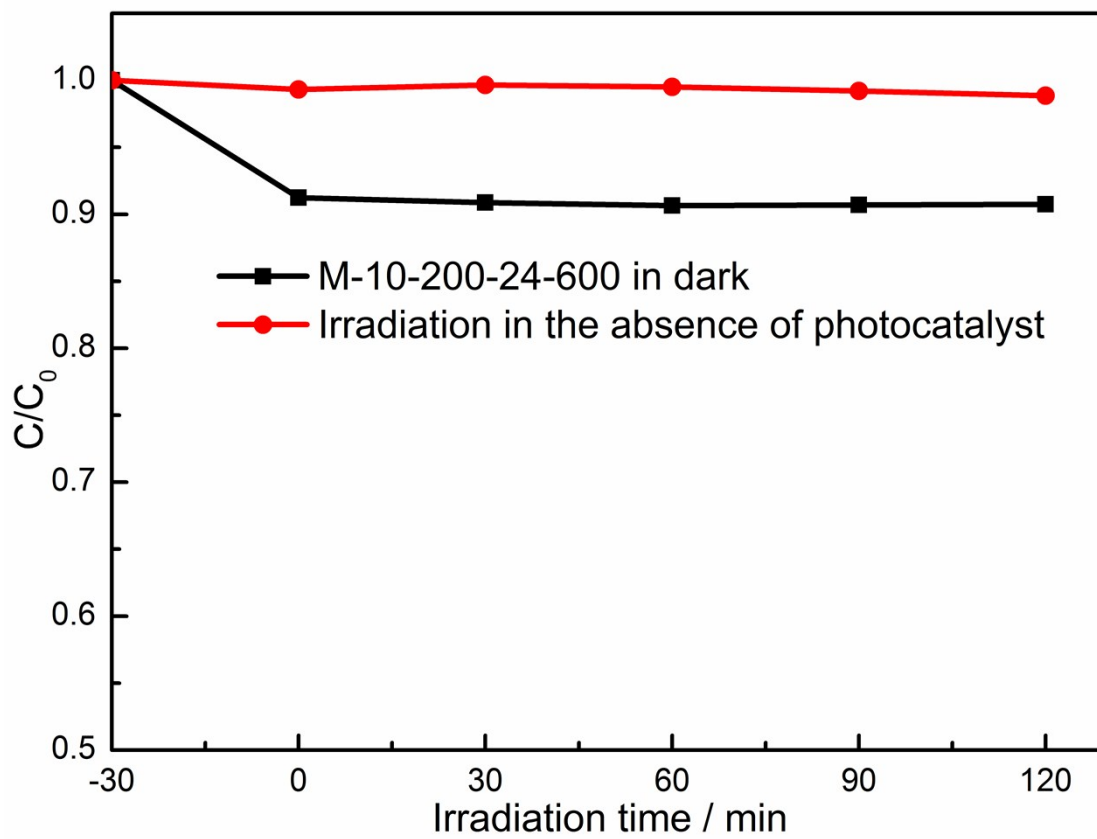

**Figure S4** photocatalytic performances for the degradation of MO

**Table S1.** The deconvolution results of XPS spectra.

|                                 | C/N  | C1s      |         |          | N1s      |                    |         |         |
|---------------------------------|------|----------|---------|----------|----------|--------------------|---------|---------|
|                                 |      | C-C      | N-C=N   |          | C-N-C    | N-[C] <sub>3</sub> | C-NH2   |         |
|                                 |      | 284.94eV | 288.3eV | 293.85eV | 398.75eV | 399.8eV            | 401.1eV | 404.5eV |
| g-C <sub>3</sub> N <sub>4</sub> | 0.7  | 14%      | 79%     | 7%       | 65%      | 24%                | 6%      | 5%      |
| M-10-200-24-550                 | 0.68 | 7%       | 87%     | 6%       | 65%      | 24%                | 16%     | 5%      |
| M-10-200-24-600                 | 0.88 | 29%      | 66%     | 5%       | 68%      | 19%                | 6%      | 7%      |
| M-10-200-24-650                 | 0.67 | 6%       | 89%     | 5%       | 71%      | 12%                | 14%     | 3%      |

**Table S2.** BET specific surface area and pore volume of the samples.

|                                 | g-C <sub>3</sub> N <sub>4</sub> | M-10-200-24-550 | M-10-200-24-600 | M-10-200-24-650 |
|---------------------------------|---------------------------------|-----------------|-----------------|-----------------|
| SBET (m <sup>2</sup> /g)        | 13.7                            | 39.3            | 60.9            | 59              |
| Pore volume (m <sup>3</sup> /g) | 0.07                            | 0.2             | 0.3             | 0.26            |
